# Supplementary material
Source: publisher site journal article supplement (https://www.dovepress.com/article/329810)
Supplement: Supplementary file 1 [file get_supplementary_file.php]

**Figure 1S. Study consort flow diagram.**

**Figure S2. Recruitment timeline**

**
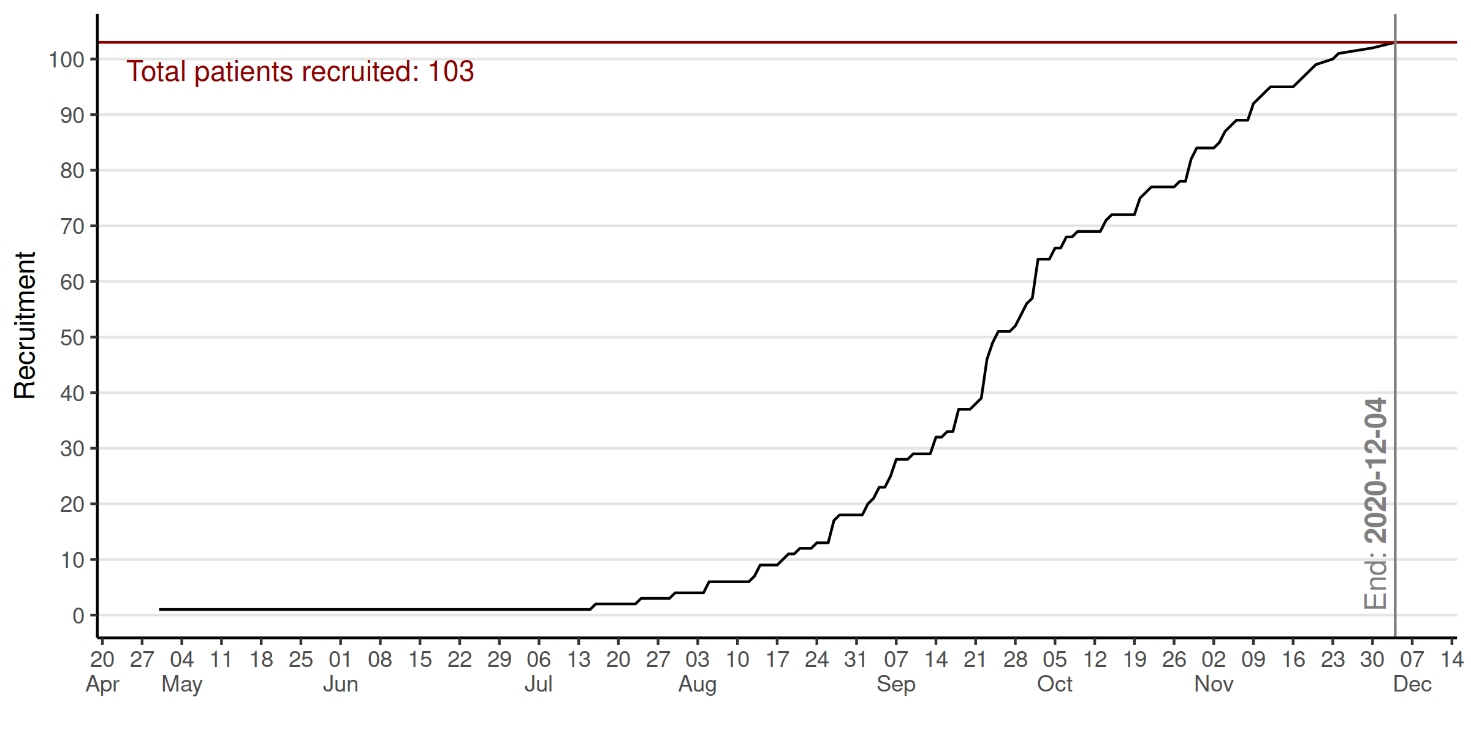
**

**Table S1. Adverse events by group.**

|  | Global  (n=103) | **Control**  **(n=51)** | **Colchicine**  **(n=52)** | P value |
| --- | --- | --- | --- | --- |
| Any non-severe adverse event | 30 (29.1) | 12 (23.5) | 18 (34.6) | 0.307 |
| Anxiety | 1 (1.0) | 1 (2.0) | 0 (0.0) | 0.992 |
| Asthenia | 5 (4.9) | 3 (5.9) | 2 (3.8) | 0.982 |
| Headache | 1 (1.0) | 0 (0.0) | 1 (1.9) | 1.000 |
| Diarrhea | 10 (9.7) | 4 (7.8) | 6 (11.5) | 0.764 |
| Chest pain | 4 (3.9) | 2 (4.0) | 2 (3.8) | 1.000 |
| Rise in transaminases | 3 (2.9) | 1 (2.0) | 2 (3.8) | 1.000 |
| Cutaneous eruption | 1 (1.0) | 0 (0.0) | 1 (1.9) | 1.000 |
| Atrial fibrillation | 1 (1.0) | 0 (0.0) | 1 (1.9) | 1.000 |
| Dyspepsia | 1 (1.0) | 0 (0.0) | 1 (1.9) | 1.000 |
| Low back pain | 1 (1.0) | 0 (0.0) | 1 (1.9) | 1.000 |
| Myalgia | 3 (2.9) | 1 (2.0) | 2 (3.8) | 1.000 |
| Allergic reaction to colchicine (self-limited) | 1 (1.0) | 0 (0.0) | 1 (1.9) | 1.000 |
| Severe adverse events | 2 (1.9) | 2 (3.9) | 0 (0.0) | 0.467 |
| Respiratory insufficiency | 1 (1.0) | 1 (2.0) | 0 (0.0) | 0.992 |
| Acute respiratory distress syndrome | 1 (1.0) | 1 (2.0) | 0 (0.0) | 0.992 |

Number (%).

**Table S2. Concomitant medications.**

|  | Global  (n=103) | **Control**  **(n=51)** | **Colchicine**  **(n=52)** | p value |
| --- | --- | --- | --- | --- |
| Angiotensin converter enzyme inhibitor | 9 (8.7) | 4 (7.8) | 5 (9.6) | 1.000 |
| Analgesics | 68 (66.0) | 35 (68.6) | 33 (63.5) | 0.730 |
| Antibiotic agent | 62 (60.2) | 32 (62.7) | 30 (57.7) | 0.747 |
| Antiplatelet agent | 5 (4.9) | 2 (3.9) | 3 (5.8) | 1.000 |
| Antitussive agent | 24 (23.3) | 13 (25.5) | 11 (21.2) | 0.774 |
| Angiotensin receptor blocker | 15 (14.6) | 9 (17.6) | 6 (11.5) | 0.549 |
| Baricitinib | 2 (1.9) | 2 (3.9) | 0 (0.0) | 0.467 |
| Beta-Blocker | 6 (5.8) | 3 (5.9) | 3 (5.8) | 1.000 |
| Bronchodilators | 31 (30.1) | 11 (21.6) | 20 (38.5) | 0.098 |
| Calcium channel blockers | 10 (9.7) | 3 (5.9) | 7 (13.5) | 0.334 |
| Diuretic | 7 (6.8) | 3 (5.9) | 4 (7.7) | 1.000 |
| Gastroprotective agent | 92 (89.3) | 46 (90.2) | 46 (88.5) | 1.000 |
| Dexamethasone | 77 (74.8) | 35 (68.6) | 42 (80.8) | 0.233 |
| Low molecular weight heparin | 99 (96.1) | 47 (92.2) | 52 (100.0) | 0.121 |
| Inhaled corticosteroids | 19 (18.4) | 6 (11.8) | 13 (25.0) | 0.140 |
| Insulin | 14 (13.6) | 6 (11.8) | 8 (15.4) | 0.804 |
| Lipid-lowering agent | 18 (17.5) | 10 (19.6) | 8 (15.4) | 0.761 |
| Lopinavir/ritonavir | 1 (1.0) | 1 (2.0) | 0 (0.0) | 0.992 |
| Aldosterone antagonist | 2 (1.9) | 1 (2.0) | 1 (1.9) | 1.000 |
| Oral antidiabetic agent | 8 (7.8) | 4 (7.8) | 4 (7.7) | 1.000 |
| Probiotic | 6 (5.8) | 2 (3.9) | 4 (7.7) | 0.692 |
| Remdesivir | 33 (32.0) | 12 (23.5) | 21 (40.4) | 0.105 |
| Tocilizumab | 10 (9.7) | 4 (7.8) | 6 (11.5) | 0.764 |

Number (%)

**COL-COVID investigational site collaborators**

| **First Name** | **Last Name** | **Academic Degrees** | **Institution** | **Location** |
| --- | --- | --- | --- | --- |
| Sonia | Marín Real | MD | Hospital Clínico Universitario Virgen de la Arrixaca, | Murcia, Spain |
| Alicia | Hernández Torres | MD | Hospital Clínico Universitario Virgen de la Arrixaca, | Murcia, Spain |
| Antonia | Castillo Navarro | MD | Hospital Clínico Universitario Virgen de la Arrixaca, | Murcia, Spain |
| Isabel | Pacheco | MD | Hospital Clínico Universitario Virgen de la Arrixaca, | Murcia, Spain |
| María | Bermejo | MD | Hospital Clínico Universitario Virgen de la Arrixaca, | Murcia, Spain |
| Marta | Vicente | MD | Hospital Clínico Universitario Virgen de la Arrixaca, | Murcia, Spain |
| Carlos | Galera | MD | Hospital Clínico Universitario Virgen de la Arrixaca, | Murcia, Spain |
| María | Arnaldos Carrillo | MD | Hospital Clínico Universitario Virgen de la Arrixaca, | Murcia, Spain |
| Mónica | Matínez | MD | Hospital Universitario Reina Sofía, Murcia, Spain; | Murcia, Spain |
| María José | Alcaráz | MD | Hospital Universitario Reina Sofía, Murcia, Spain; | Murcia, Spain |
| Cristina | Tomás | MD | Hospital Universitario Reina Sofía, Murcia, Spain; | Murcia, Spain |
| Gonzalo | Martínez Fernández | MD | Hospital Universitario Reina Sofía, Murcia, Spain; | Murcia, Spain |
| Ángela | Santo | MD | Hospital Universitario Reina Sofía, Murcia, Spain; | Murcia, Spain |
| Ana | Martín | MD | Hospital Universitario Reina Sofía, Murcia, Spain; | Murcia, Spain |
| Eva | Oliver | MD | Hospital Universitario Reina Sofía, Murcia, Spain; | Murcia, Spain |
| Vicente | De la Rosa | MD | Hospital Universitario Reina Sofía, Murcia, Spain; | Murcia, Spain |
| Alejandro | De la Rosa | MD | Hospital Universitario Reina Sofía, Murcia, Spain; | Murcia, Spain |
